# Supplementary material
Source: ML conference proceedings conference paper supplement (https://openreview.net/forum?id=S5UG2BLi9xc)

Dataset

Predictive  
uncertainty

Two-sample  
classification

Residual  
diagnostic

Test type

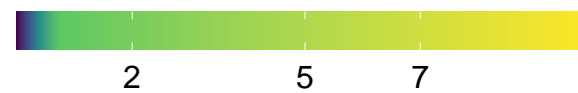

Supplement: supplementary_material [file attachment]

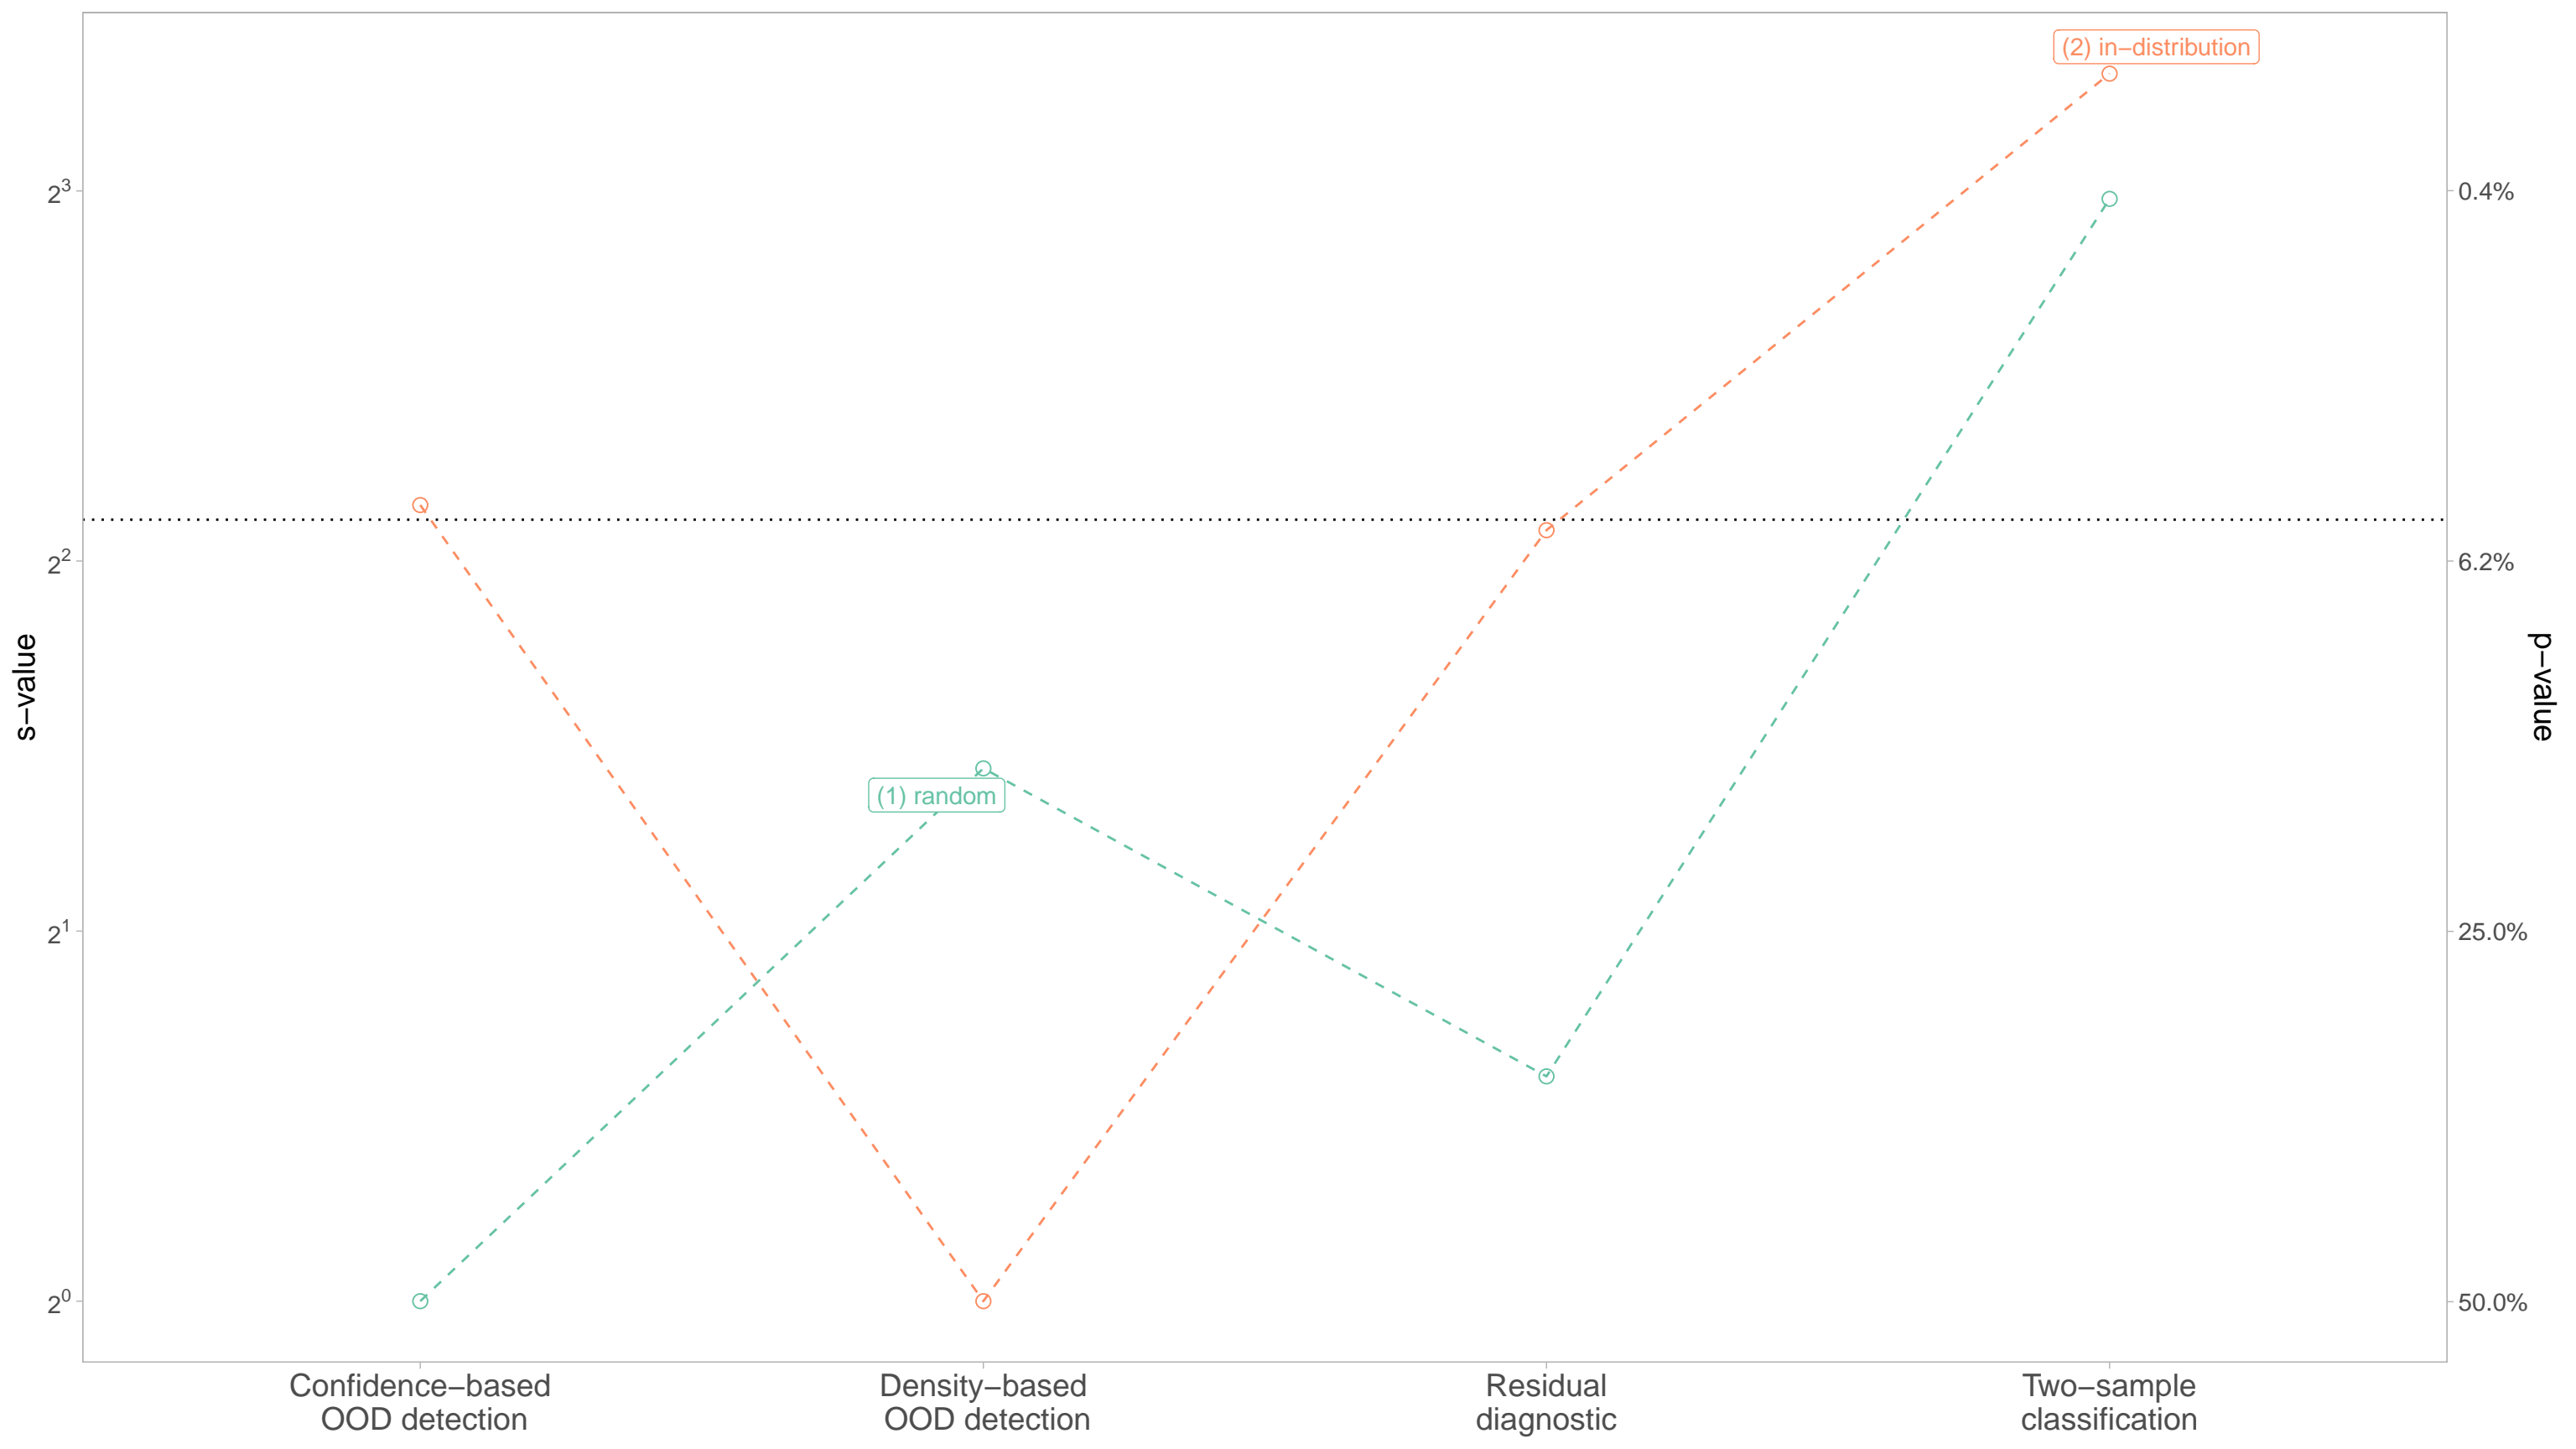

Supplement: supplementary_material [file attachment]
